# Supplementary material for: Using Qualitative Repertory Grid Technique to Explore Students’ Perceptions of an Ideal Hostel Built Environment
Source: Preprints.org preprint supplement (doi:10.20944/preprints202306.1641.v1), 2023-06-22
Supplement: Supplementary file 1 [file supplementary]

Supplementary Material

# Answers for research question (1) How do students make sense of their living experiences within a built environment?

## Coded answers for question (a) comparing the places together, how do you describe your living experience in each of them?

| 01 | It is never better to live at home. In the NC hostel was the best experience. (A)At home, I do not like studying because honestly, there are all the elements that make you not concentrating in the study like going out. The family members, they come in and out from the room frequently; this is the most distracting thing. Maqam 4 is a nice one and calm, there is sound insulation, but (B) I prefer the NC hostel because it is near to the collages, (F) there is more life here than Maqam 4 hostel. There are students from all levels. In maqam 4, the majority are newly admitted students. You feel there is not that much of interaction among students. All of them have the feeling of beginning; they are not in the university mood yet. Therefore, from this aspect, I prefer the NC hostel. |
| --- | --- |
| 02 | Ok, I will start with the home, because I lived in longer than other places. The home you feel the space is narrow for you. The family is here, and you are studying, the atmosphere never helping to study. It is never helping. But when we moved first to Maqam 4 hostel; it was helping. It is true that I am as an engineering student I go to labs; I must attend the labs face to face, and the reaming of the courses are all in Maqam 4 online. (A) Maqam 4 was very helping from all aspects. It is helping me to live as a university student or as student who study. Why this, because first the rooms are insulting. I cannot hear the noise outside. Second the room is spacious; it is sufficient for you and your staff and everything. Third, it is true that may be there are some negatives, but the positives overwhelm in Maqam 4 more from the aspect that there is no noise, and the space is spacious. The bed is comfortable. What else. (c) The room, its colors are stimulating for studying. About the negatives, (H)little the bathroom might be little narrow. I am used to have a wide bathroom at home, and I entered Maqam 4 and the bathroom is little narrow, so it was little annoying but still the positives are overwhelming the negatives. Moving to the NC hostel, when I tried it last time, (c) the NC hostel is more refreshing. The place is white. The place, it is true that it is little smaller than Maqam 4, but it is refreshing. (A)The only negative in NC hostel is that it is a place of noise. It is noisy. There is no insulation to not hear the noise outside. It was very annoying. Any step literally, my room was in building 1 at the side of the emergency room, so whoever opens the emergency door and close the emergency door, I wake up from my sleep. Especially, I am an engineering student, and we are almost the engineering students, our classes start from the eight o’clock. So it was very annoying .. I hear you and your noise, how I concentrate on my study?! Already not all my classes are face to face. I still have courses that are university requirements, most of them are online. So with the noise outside and the sir is talking in front of me, I do not concentrate. The room is not insulating. But from the aspect that is refreshing; it is more refreshing than Maqam 4. But the Maqam 4 wins with the insulation of sound frankly.  Sub-question: so where you feel the experience was the best?  In NC hostel, because everything is adjacent to each other. Even the collages are close to us. |
| 03 | First thing, the home Ma shall Allah, we are big family, so it was difficult. I am in the home a person who my family put on him a lot of responsibilities. I teach my brothers. So it was difficult for me in addition to the annoyance of my little brothers. All of them were studying online, and our house although it is two floors, but it is not enough because we are a lot. We are eight children and all of them studying except the youngest one, he is still a baby. But the rest from me, seven in the home are studying online. You cannot imagine how it is noisy in the morning. My mother cannot alone to supervise the children, so I was running my classes and four on the right and left, so it was difficult on me. Very very difficult to study at home. Noise. There is not time for me to study, and I help at home. Too many things to do. When I went to Maqam 4, I became comfortable form the side of studying and calmness and everything. Everything was okay. Everything was available. But (C)the only problem in Maqam 4 is that I felt the place is little depressing because of the colors. The place color is brown. Little bit a scary place. But the other thing all are okay; only the color, the brown I feel that is available there is little scary because I am afraid person.  Sub-question 2.1: where did you observe the brown color?  On the doors and the corridors are narrow. They are also scary. The bathrooms are very okay in Maqam 4. The shower; its head you can move it and second thing the place is warm and third thing there is a hot water. **(A)**The new campus hostel, sounds; the rooms have no insulation. Second thing the place you can imagine how cold it is. I have a sensitivity form the cold. When I went to the new-campus hostel; all the time I am sick. Al the time I am taking tablets for the sensitivity because of the cold there. I got sick a lot, very much. I can not bear a strong cold. The cold is very strong. Second thing, the head of the shower can not be moved. It is hold up. When you want to take a shower only for your body, you cannot. Your hair get wet. This is a problem, and there is no hot water. The place is very cold, and sometimes it is noisy. It is not that much of noise, but still you hear voices. Girls are passing, you hear them. You got me. But the other things thanks God. The government is not derelict. Everything is okay. But these things are small. |
| 04 | Ok. At home, (A) first thing our home is calm, so the situation was very okay for me. At the same time, there was no motivation for studying because I am the only student, and all are out of the home most of the time. For maqam 4 hostel, it has something of university mood. The friends. **(G)** And the same time there was a privacy in the hostel, each one has her own room alone. We do not hear sounds. Calm. (E) Also, we can meet each other in the studying room, we can meet each other. So it was okay nice. Regarding the new-campus hostel, honestly the new-campus is in between home and maqam 4, the rooms are very sensitive. The sounds, you can hear everything. **(B)** It is closer to the canteen and the university. The only negative thing in it is the sound. The sound is very annoying specially at night when we want to sleep, it was the most annoying. I was preferring studying in the library than studying in my room. maqam 4, it is a mix of two. It has people and motivation, and at the same time there is calmness as well. |
| 05 | Honestly, it is a nice experience. It is better than sitting at home because the studying mood is better than the home mood. The atmosphere allows you to study and pay attention to the class. And the university mood as well.  question 2.1: what are the things that create for you the studying mood as you feel it?  First thing is that being here in the hostel and the university. **(B)** We are already within the university campus. If I want something I go back to the university. It is near to me. Besides, the atmosphere itself is a study mood. You do not distract yourself with something else. When I was in Maqam 4, we were not in group A and group B, I was sitting there for whole month in maqam 4 alone. The adjacent room has nobody. **(A)** Maqam 4 is different and the new campus as well, but the thing that is not nice in it is the sound can be heard, and there is sharing toilet. Everything can be heard. Even the outdoor at the beginning of the corridor can be heard. |
| 06 | First thing, my studying at home was nice and not difficult. You wake up from sleep and open your classes directly without preparing yourself. When I went to the university for the face-to-face classes, the situation was little tired. First thing you wake up in the morning to prepare yourself, then you wait for the bus to pass by you and go to your classes. But the face-to-face classes is nicer. Because there you get benefits and contact other people and make new friends. **(A)** At home, for example, when the doctor asks me a question, I cannot open the mice because sometimes it is crowded at home. But in maqam 4 or new-campus hostel, normally, I can open the mice and speak because there is calm. Maqam 4 I feel it is better because it is away from crowd, and there is sound insulation between the rooms. But in new-campus hostel, you can hear everything, and **(B)** it is close to the collage buildings. There is no sound insulation between the rooms. You can hear everything, all steps. |
| 07 | My experience in maqam 4, as it was my first semester, **(A)** the hostel was very nice as there was an insulation between rooms, so the place is calmer than the new campus. You do not hear the screaming outside or if someone is walking opposite to the new campus. **(B)** But the only bad thing it is little far from the classes. You walk more when you are in the university. Whereas in the new campus, the nice thing it is close to the canteen and close to my classes especially the buildings are very close to it even the labs. But the only bad thing, it has no sound insulation. Especially, like in weekends, you hear people sitting outside, someone walking in the corridor. The talks of the girl in the adjacent room. This is only its defect. But as a hostel and my experience of being in a hostel, it is a nice thing. The place that everything is organized and clean even the canteen. From home, if it is online, it is comfortable fine. |
| 08 | At home, frankly, it was very difficult, because it was very crowded, and I could not concentrate. My grades were very low, I noticed that when I came to the hostel, my grades went much higher. From c and b reached to a and b. About the difference between maqam 4 and nc hostel, I did not feel there is too much difference, but **(A)** in maqam 4, the place was clam more. I was sleeping better. |
| 09 | At home, for the studying is better. It is calm. I am alone and can arrange my schedule. **(F)** In maqam 4, it is vey calm to the extent you can get sick because it is very calm, and you feel lonely. Really alone. Whereas in nc hostel, you feel this hostel is very nice. **(A)** You can study in it but little noisy. Because there is no sound insulation in doors and so on. |
| 10 | At home 3 out of ten. In maqam 4 5 out of ten. In nc hostel 10 out of ten. At home, I cannot concentrate that much because of the crowd. **(B)** Maqam 4 is very far from the collages, especially, the first semester there was no buses, so I have to walk from maqam 4 till the university. Nc hostel is near. It is very near to the university, and it is better, when I study in this hostel I can concentrate more. |
| 11 | I feel as university hostels, it is better than home because we have too much kids, so we cannot concentrate on studying that much. **(A)** In the university, in maqam 4 there is sound insulation, so the concentration is high, **(B)** but its problem is that it is far away from nc hostel and to walk till the university itself. While **(E)** in ns hostel, it is well organized, the environment is motivating. It makes study well. **(A)**The problem, there is no sound insulation. Everything can be heard almost, (B) but it is near to the university. |
| 12 | **(A)** First thing in maqam 4, the place I felt it was calmer. It was something good, (C) but as a décor for the place, I felt no. Psychology, it was hurting me little. I felt the places are closed. The colors; there were green, purple. It was not helpful. **(D)**Additionally, the windows were very small, Imagine I was in the fifth floor, and no sun was entering to my room that much. So what about people blow?! **(C)** Then in new campus, I was in the first floor, it was nicer. I felt the colors are lighter and exhilarating. Windows are bigger, but still not in all rooms, there is sun entering. The previous semester, my room was inside, so no sun was entering. That was I did not like that much. **(A)** In the new campus, the problem that we all face is the sound problem. It reaches fast. Besides, the alarm system rings a lot daily; more than seven time a day. Sometimes at night or morning, it is very annoying. From home, the situation was good, but the problem you know studying there is different than on-line. In the online, you do not feel comfortable that much. But the rest everything was OK. |
| 13 | Honestly, it is nice to have it differently, sometimes at home, other times in the university. I am being with my family and also in the university it is nice to have the campus life. **(B)** Personally, I love being at home more. It is more comfortable to have it online or at home, **(A)** but also it is nice to go to the university for a period. (A)It was calm, but **(C)** maqam 4 was dark and depressing little. |
| 14 | At home, it is the worst place. **(A)** The noise of the people at home, and I cannot concentrate. Every time, someone interrupted me, or me I cannot concentrate. In maqam 4, it was the best place. It is a calm place, no noise, no crowd, and the environment is calm. Th new campus was also a bad experience. There is noise, you can hear everything, people in corridors and so on. It is very noisy. You cannot concentrate. Noisy, and we are all adjacent to each other. |
| 15 | My experience in maqam 4, as it was my first semester, **(A)** the hostel was very nice as there was an insulation between rooms, so the place is calmer than the new campus. You do not hear the screaming outside or if someone is walking opposite to the new campus. **(B)** But the only bad thing it is little far from the classes. You walk more when you are in the university. Whereas in the new campus, the nice thing it is close to the canteen and close to my classes especially the buildings are very close to it even the labs. But the only bad thing, it has no sound insulation. Especially, like in weekends, you hear people sitting outside, someone walking in the corridor. The talks of the girl in the adjacent room. This is only its defect. But as a hostel and my experience of being in a hostel, it is a nice thing. The place that everything is organized and clean even the canteen. From home, if it is online, it is comfortable fine. |

## Categorization of codes: Main indicators of Students’ living experiences with its associated impacting design factors

| **Factors** | **Impacting design elements** | **Students’ perceptions** |
| --- | --- | --- |
| **Studying** | (A)Presence/ absence of Sound insulation | *“At home, it is the worst place. The noise of the people at home, and I cannot concentrate. In maqam 4, it was the best place. It is a calm place, no noise, no crowd, and the environment is calm. Th new campus was also a bad experience. There is noise, you can hear everything”*  *“In the university, in maqam 4 there is sound insulation, so the concentration is high. In NC hostel, the problem, there is no sound insulation. Everything can be heard almost”*  *“You can study in NC hostel but little noisy. Because there is no sound insulation in doors and so on.”*  *“At home, for example, when the doctor asks me a question, I cannot open the mice because sometimes it is crowded at home. But in maqam 4 or new-campus hostel, normally, I can open the mice and speak because there is calm. Maqam 4 I feel it is better because it is away from crowd, and there is sound insulation between the rooms. But in new-campus hostel, you can hear everything”*  *“First thing our home is calm, so the situation was very okay for me. In Maqam 4, We do not hear sounds. Calm. The new campus, the rooms are very sensitive. The sounds, you can hear everything I was preferring studying in the library than studying in my room.”*  *“Maqam 4 was very helping from all aspects. It is helping me to live as a university student or as student who study. Why this, because first the rooms are insulting. I cannot hear the noise outside.”*  *“Already not all my classes are face to face. I still have courses that are university requirements, most of them are online. So with the noise outside and the sir is talking in front of me, I do not concentrate. The room is not insulating.*  *“At home, I do not like studying because honestly, there are all the elements that make you not concentrating in the study. Maqam 4 is a nice one and calm, there is sound insulation”* |
| (E) Availability/unavailability of natural environment  Availability/unavailability of sharing studying facilities | *“NC hostel, it is well organized, the environment is motivating. It makes study well”*  *“At home, there was no motivation for studying because I am the only student, and all are out of the home most of the time. For maqam 4 hostel, it has something of university mood. The friends. Also, we can meet each other in the studying room, we can meet each other. maqam 4 has people and motivation”* |
| Spacious/narrow bedroom | *“The room is spacious; it is sufficient for you and your staff and everything.”* |
| (C)Lightness/darkness of interior colors | *“The room, its colors are stimulating for studying.”* |
| **Sleeping** | (A)Presence/ absence of Sound insulation | *“In maqam 4, the place was clam more. I was sleeping better.”*  *“The new campus, the rooms are very sensitive. The sounds, you can hear everything.* *The sound is very annoying specially at night when we want to sleep, it was the most annoying.”*  *“The only negative in NC hostel is that it is a place of noise. It is noisy. There is no insulation to not hear the noise outside. It was very annoying. Any step literally, my room was in building 1 at the side of the emergency room, so whoever opens the emergency door and close the emergency door, I wake up from my sleep. Especially, I am an engineering student, and we are almost the engineering students, our classes start from the eight o’clock. So it was very annoying”*  *“The bed is comfortable”* |
| **Accessing daily needs** | (B)long/ short distances to nearby facilities | *“The only bad thing in Maqam 4 hostel is that it is little far from the classes. You walk more when you are in the university. Whereas in the new campus, the nice thing it is close to the canteen and close to my classes especially the buildings are very close to it even the labs.”*  *“Maqam 4 problem is that it is far away from NC hostel and to walk till the university itself, but NC hostel is near to the university.”*  *“Maqam 4 is very far from the collages, especially, the first semester there was no buses, so I have to walk from maqam 4 till the university. Nc hostel is near. It is very near to the university”*  *“NC hostel is close to the collage buildings”*  *“We are already within the university campus. If I want something I go back to the university. It is near to me.”*  *“NC hostel is closer to the canteen and the university.”*  *“I prefer the NC hostel because it is near to the collages”* |
| Psychological Status  Feeling of depression  Feeling of loneliness  Feeling of Privacy | (C)Lightness/darkness of interior colors  *Feeling of depression* | *“Maqam 4 was dark and depressing little.”*  *“But as a décor for the place, I felt no. Psychology, Maqam 4 was hurting me little. I felt the places are closed. The colors: there were green, purple. It was not helpful.* *Then in new campus, it was nicer. I felt the colors are lighter and exhilarating.”*  *“The only problem in Maqam 4 is that I felt the place is little depressing because of the colors. The place color is brown. Little bit a scary place.”* |
|  | (F)  Feeling of loneliness | *“In maqam 4, it is very calm to the extent you can get sick because it is very calm, and you feel lonely. Really alone. Whereas in NC hostel, you feel this hostel is very nice.”*  *“There is more life here than Maqam 4 hostel. There are students from all levels. In maqam 4, the majority are newly admitted students. You feel there is not that much of interaction among students. All of them have the feeling of beginning; they are not in the university mood yet. Therefore, from this aspect, I prefer the NC hostel.”* |
|  | (G) Individual/sharing rooms  Feeling of privacy | *“There was a privacy in the hostel, each one has her own room alone”.* |
|  | (H)Spacious/narrow bathroom | *“The bathroom might be little narrow. I am used to have a wide bathroom at home, and I entered Maqam 4 and the bathroom is little narrow, so it was little annoying”* |
|  | (D) Plenty/lack of sunlight | *“In Maqam 4 the windows were very small, Imagine I was in the fifth floor, and no sun was entering to my room that much. Then in new-campus, windows are bigger, but still not in all rooms, there is sun entering. The previous semester, my room was inside, so no sun was entering. That was I did not like that much”* |

# Answers for research question (2) What main design factors of the built environment contributed to students’ psychological being?

## **Coded answers for questions (b) Comparing these three places together, where you feel psychologically better and why? (c) What are the design aspects of these spaces that you feel affecting you positively? (d) What are the design aspects of these spaces that you feel affecting you negatively?**

| 01 | (**A**) In NC hostel I am better. I am so distracted person easily. I cannot concentrate easily. The NC hostel is a calm place. There almost we are all after the basic first academic year, so at the study time, all are silent and calm. Very rarely to feel noisy.  My psychology in the hostel becomes better because I feel I am depending on myself. My schedule is running as I want it to be and as I planned it. I wake up morning. I go to study. I came back to relax. I go then to the library. There are things I do related to my study. Here no, family gathering, and coming in and out. My schedule at home, when they are sleeping, you wake up studying. It is little difficult.  sub question 3.1: if we compare the NC hostel with Maqam 4 hostel, where you felt physiologically better and why?  (**B**)Honestly, I will say NC hostel because of one reason which is in Maqam 4 I was still new student. I was still feeling afraid from the beginning. I was not knowing anyone. In NC hostel, the girls were very nice. If they saw a girl sitting alone, and they were doing something, they invite the others. They were much nicer than the new students in Maqam 4.  question 4: in your opinion, what are the design aspects of these spaces that you feel affecting you positively?  (**C**) The rooms in the NC hostel are white; their colors are light.  **(D)**The greenery is everywhere, whenever you turn your head, you see greenery,  **(E**)but from the side of lounges and study rooms, Maqam 4 was better. There is lounge space and study room, and the space was on itself.  (**F**)The availability of the library near to the NC hostel is a nice thing. When I want to change my mood of study, I go to the library to study.  (**G**)The Aspects at home, I like studying at the desk, and this is available in the NC hostel; every student has her desk alone in her room.  (**H)**The lighting: this is the thing that NC hostel missing. There is not too much light in the room. When the sun sets, we depend on a very small amount of light.  question 5: in your opinion, what are the design aspects of these spaces that you feel affecting you negatively?  **(G)**At home, if I could have a space alone, because we are a very big family, so it is rarely to have an empty room at home to study in alone. This is at home.  (**A**)In the NC hostel, the privacy is little week. There is no insulation. The doors are all wood, not wood, I do not know what it is called the material, but we can hear the sounds across it highly. **Even the steps of people outside, we can hear it. To this extent, the sound can be heard inside the room. This is affecting our sleep, you wake up from every sound especially if the girl besides you in the adjacent room, you do not know her, and you did not agree on the situation between each other. She is annoying, and you want to sleep; this is making it little difficult.**  (C)In Maqam 4 hostel, the colors are very dark. They are very, very dark. The rooms are pink. The curtains are pink. The table is brown. The doors are brown. You understand. The things, whatever the light is strong, still the room is depressing.  (D)But the greenery outside is nice. It has a nice impact. When you open the window, you find green views. |
| --- | --- |
| 02 | I feel maybe Maqam 4 was the best with the NC hostel but Maqam 4 more. Why Maqam 4 is more because as I told (A)you from the beginning the insulation of Maqam 4 is very nice.  **(I**)Even the lounge space in Maqam 4 is refreshing and it is big. I close the door, sit alone, even if one of my friends come in, we do not hear the noise outside. We study and we are all concentrating in the space. In NC hostel, I was able to study in it, but the noise outside was interfering the clam place if I made for myself a study mood. Th noise outside makes me not concentrating in the study. So Maqam 4 wins for the study and comfort there.  Sub-question: and what about if we compare these hostels with you home concerning your psychological comfort?  Of course, the hostels win. You go far away from home. Especially, because I graduated from the high school, and we were in corona period. So I was quarantined at home. Especially because I am student from the school days, I do not sit at home. My vacation days I do not spend them all at home. I spent them in volunteering and going out of the home. I tried the experience of the ambassadors. I travelled abroad and alone with small age, and I was responsible of myself. I did not use to be at home a lot or sit with them a lot. Corona period was making me sit with them a lot, and it was very noisy. The hostel life wins of course. It returned me to the normal life of being out of the home and living alone and be responsible of myself.  question 4: in your opinion, what are the design aspects of these spaces that you feel affecting you positively?  (I)The first thing is the wide space. I mean look, we in the NC hostel rearrange the desk and the bed locations a lot to make the room becomes wider.  (c)Second thing the light colors. The NC hostel helps a lot because the colors are very light and motivates us for studying, but (J)the negative thing is that in most rooms the lighting is dim, and it never helps for studying. The lighting of the bathroom is stronger than the lighting in the room. Sometimes, I have to open the bathroom door to allow more lighting to enter my room or I bring with me some light form home to increase the lighting of the room. Maqam 4 no, it was very good. It was good form the aspect of lighting, it is very strong, and it helps for studying.  (c)The room, because I am little biased towards the light colors such as, yellow, blue, baby blue, and others and not for the pink, the colors in building 16, the room was violet or pink; I do not like these colors, and the curtain was also pink. I was not like it. I entered building 13, the curtain was nice, and the place was nice. In building 14, I had been quarantined because I was of the contacts for COVID positive case, and frankly the building wins in Maqam 4. The rooms are very very light. The color is light. The curtain is light.  The place wins because of you can studying and do all your activities there. I mean the place is sound isolating, light colours; the place where I am satisfied for studying and for my psychology and everything. The place is light. Its curtain is light. The place is sound isolating.  (I)The place is wide, and it helps me for all moods. The NC hostel is little narrow.  question 5: in your opinion, what are the design aspects of these spaces that you feel affecting you negatively?  May be, what annoying me little is the dark colors. For example, as I told you the pink colors and pink curtain in Maqam 4. It was not all one solid dark color. No, it was like decorated, but it was pink. It was annoying. The bathrooms in Maqam 4 also were dark. It was the dark burnt brown, so it was little annoying me. The dark colors annoy me little. But there is no other negative thing. I do not feel there is other negative things. Maybe the quality of the bathroom also little. (I)The bathroom is narrow. The sink where I sink my face is bigger than the bathroom inside. But maybe this is because of this building is a big one and can occupy around sixty thousand students in the whole building, so maybe there is no enough space to make the bathroom bigger. I do not know, but these are the negatives, and they are very simple. The positives overwhelm them. |
| 03 | In the new-campus, the place is … I will tell you something, (I)in maqam 4, the bedrooms are little wide, but in new-campus, they are very small. Because of the its small size, each time I pass by something, I get back home, my legs are blue because I hit the things in the room. Because it is very very small.  (C)The place in the new-campus; the white color is motivating. The while color makes you feel comfortable. When I pass in the corridor, I was not feel afraid as I was feeling afraid in the corridor of Maqam 4. In Maqam 4, when I was passing in the corridor, I was running to reach my room because I feel the brown color is scary.  **Second thing, the light in the corridor is switching off, so I hit by my legs from very far to get the lights on. Because I am very afraid of dark and the narrow places.**  question 4: in your opinion, what are the design aspects of these spaces that you feel affecting you positively?  The home I feel it is a place for being comfortable. It is impossible to study in it. I do not feel I can study like I am studying in the university, in the hostel of the university.  (C)I feel the light colors when they are available in a place, the place becomes very comfortable. You feel comfortable, but when the colors of a place are dark.. the colors of my room at home are light, and I have a big window. I have a desk and bed. My furniture are all white, and the walls are very light pink, even sometimes you feel it white. Therefore, I prefer the light colors because the place when I feel comfortable in I feel it should be with light colors. I do not like dark colors at all, because the light colors you feel comfortable. A place when you enter and see its light colors is different from a place with dark colors like brown.  question 5: in your opinion, what are the design aspects of these spaces that you feel affecting you negatively?  (**A**)In the new-campus, there is no sound insulation. I feel there is no privacy. Sometimes, when I talk with my family by phone or with anyone, I need a privacy. The girl in the adjacent room if she was in the bathroom or in her bedroom can hear me. This is annoying me and annoying her. It is annoying me, because there are private things; I do not want someone to hear, and she can hear it. Second thing, she might be get annoyed by my voice. This is I see it not okay, and also the place is cold. I feel this is the most important thing. This is it.  In Maqam 4, the corridors are narrow, and the doors are brown. The colors are dark. Colors are not comfortable at all to the eye.  The kitchen in maqam 4 is better than that in the new-campus. Sometimes, I do not want to eat from the canteen and do not want to order from restaurants. I feel sometimes, I want to prepare something light such as, light soup by my hands. Something is comfortable for me. The new-campus has no stove, but in maqam 4 there is stove.  (E)Sometimes, the girls bring electrical stove, and they put in the new-campus and cook. The rooms that are adject to the kitchen.. because the kitchen is not closed., get hurt from the smell. You get it because the kitchen is not closed, but in maqam , there is a closed kitchen.  (**G**) And there is a study room, but we in the new-campus have no study area. I was very benefit form the study area; sometimes I do not want to sit in the bedroom. I want to change, so I go and sit in the study area. new-campus hostel has no study area. There is a place for sitting, but I feel it is not comfortable. Girls are passing. |
| 04 | In the new campus, because it is opposite to maqam 4 and home, (B) there the movement was more. There are many girls walking, eating, playing. It was very nice atmosphere. When I was living in maqam 4, I was not having a roommate, but when I lived in the new-campus hostel, I was having a roommate. So, if I wanted anything for example, I could go to her.  question 4: in your opinion, what are the design aspects of these spaces that you feel affecting you positively?  As a design,(H) at home, the windows are very big; I like the space having too much natural light.  (I)For maqam 4, as a design we can say the design of the room. It is nice. It is small, but you do not feel it too small. You feel the bed and cupboard are in places make the room still have a space. The space is not too much compacted. For the new-campus hostel, the design is not that much, the nicest thing is that there was a roommate.  question 5: in your opinion, what are the design aspects of these spaces that you feel affecting you negatively?  I will say (J)the lighting. It was the weakest in the new-campus hostel. I am kind of person when I feel the room is very well lit; I feel nice. For Maqam 4, nothing; everything was okay. |
| 05 | Frankley, in new- campus hostel because (B)when I was in Maqam 4 I was just now the first time I am entering to hostel and being away from my family. I was sitting there a month. So it was too much on me, so I was feeling the difficulty. But thanks God, I am very comfortable. In new campus hostel, I have my friends with me in the same building. There are few rooms among us. I do not know. I feel the comfort.  question 4: in your opinion, what are the design aspects of these spaces that you feel affecting you positively?  Honestly, (**G**) maqam 4 is more than the new- campus from many aspects. First aspect there is no sharing. Additionally, for example, the shower in maqam 4 is very different than in new campus. Also,  (I)the room in new campus is little narrow. The cupboard I do not know how it is. wherever you put your hand in a place you hit your hand. In maqam 4, the place is organized well.    question 5: in your opinion, what are the design aspects of these spaces that you feel affecting you negatively?  For example, in the new-campus, the shower head can not be moved. You can not adjust it. (**J**)You feel the room is not that much for studying. It encourages sleep. May be because of the lighting, and  (**A**)the noise that can be heard. Girls in the university are staying awake till the dawn. You feel noise little, it can be heard. |
| 06 | Let me think, honestly, the house is better because you did not get tired. Jut you wake up and you can attend your classes, but the bad thing is the exams. I do not like the on-line exams. I feel it is better to have it face-to-face. Maqam 4 is the best because at home you do not feel like you are student. You can go away and sometimes you do not concentrate, but when you are in the university. (**A**)You can focus the first thing, and the place there is calm. Your concentration mostly is towards studying not playing. But at home, for example, it can happen that your mother came suddenly saying that let’s go out and the place is not suitable for studying.  question 3.1: what if we compare Maqam 4 with the new-campus, where you feel psychologically better an why?  **F** Maqam 4, although the place is little far, and scary a little because it is far from the university and collages. But what I like in it is that  (**A**) it is calm, and if there was a crowd in the corridor for example, it can not be heard form inside the bedrooms. In the new-campus hotel, everything can be heard.  question 4: in your opinion, what are the design aspects of these spaces that you feel affecting you positively?  **C** I see The design of the new-campus is nicer. How they put the white color, how they make beds in brown color. But the maqam 4 what I do not like in it is that they make the bathrooms with pink color. I did not feel it is nice. But in maqam 4 when you enter, there is a corridor then a room to the right and room to the left and bathroom in between.  question 5: in your opinion, what are the design aspects of these spaces that you feel affecting you negatively?  (J) In the new-campus, I did not like the lighting because it is very simple, light; you must bring light form home.  **I** **Second thing is that the size of the room is small, but in maqam 4 it is bigger. But how they designed the cupboard, beds I like it**, and  **C** the colors how they match it. But in maqam 4 I did not like the interior colors.  **D The view was not nice in maqam 4, because the view was on a sand. But in the new campus, the view was on the trees and plants and buildings.** |
| 07 | **F** Absolutely, the home, because it is easier. At home, the comfort is more than in the hostel because for example, the food is near. Everything is available. Whereas I am in the hostel, I have to go to the canteen in a specified times before it closes, before it becomes crowd. For example, if I want something, I go to the supermarket. This requires time. At home, it is opposite, it is more comfortable. Everything is available, so I do not waste time.  question 3.1: and if we compare Maqam 4 with the new campus, where you felt better?  **F** Mmm, I think in the new campus because it is close to the canteen. I can go to the canteen and comeback to the room in shorter time, and also you do not feel tired. When you walk from Maqam 4 to canteen, you reached little tired from waking. The new campus is more comfortable at this point. Even, with the classes, I go before the class by five minutes to reach, but in Maqam 4 I go before ethe class by ten minutes or a quarter.  question 4: in your opinion, what are the design aspects of these spaces that you feel affecting you positively?  **G** Positively, mmm. Maybe the study tables because it is like the study table I have at home. In the new campus, the board at the wall, where we can stick our notes, was very useful.  J In maqam 4, the lighting was very helpful for studying and without studying, but in the new campus, the lighting is little dim. At home, the room itself, the comfort level like this.  question 5: in your opinion, what are the design aspects of these spaces that you feel affecting you negatively?  A In the new campus, the noise especially at night and the lighting, whereas in maqam 4, I feel nothing, and also at home nothing.  **F** Maqam 4, only the distance, it is far. |
| 08 | Psychologically, I feel in maqam 4. It was not as groups; it was you stay there for whole semester then you go home. There is no need to change my room, no need to take all my staff to home and so on. I was staying there then ai go home then to the NC hostel. It was not difficult that much. **And also, it was not crowded. I was able to sleep well**.  **And the light was not strong. In Maqam 4, there is black out curtains, but in NC hostel, the light interfere form outside and form below the door as well. The lights of the corridors are not witched off.**  question 4: in your opinion, what are the design aspects of these spaces that you feel affecting you positively?  I feel in home just the availability with my family. This is what makes it positive more.  **D** Whereas In maqam 4 hostel I loved the gardens, because I was studying a lot outside, and there are tables with chairs. I was studying there and felt the studying mood is there.  **F** In the NC hostel, everything is close to each other. The canteen is nearby. The food court is near. The gym is near. No need to walk too much like I was walking when I was in maqam 4.  question 5: in your opinion, what are the design aspects of these spaces that you feel affecting you negatively?  Negatively,  A I have brother and sisters and they were making too much noise and need help. This makes me slow in my study. Whereas in maqam 4, it was very clam.  **B** I was not seeing humans. They are mostly online, and my friends all were online except me. I was almost alone.  In the Nc hostel, the rooms can be heard from outside, there is nothing to insulate the sound. If I talked, my neighbor would hear me. |
| 09 | As studying, in Maqam 4. As a life is better in nc hostel. The room is more organized and nicer.  **B** I can be with my friends more. Not like maqam 4, you can be with you friend more in nc hostel. At home, it is very nice and OK. They encourage me as student studying in UAEU.  question 4: in your opinion, what are the design aspects of these spaces that you feel affecting you positively?  At home, the positive thing that makes me study is my family, but in the university,  **A** in maqam 4 because of the calmness, I feel I want to study. It is calm. I cannot do anything except studying.  Whereas in nc hostel, also you feel you like to study as well. They all get excited and study down.  question 4.1: what about the design aspects of these spaces that affects you positively for studying?  NC hostel is the best place for studying, I think. It motivates us.  **G** The rooms also motivate us for studying. You can sit on it for.. you do not feel the time. The board I can use to put my staff, and the desk besides, so everything is organized. |
| 10 | **B** In nc hostel. Because all my friends there. We sit together in the lounge that is in the floor and study. It is better. Sometimes like in weekends, the girls make some activities like football or volleyball.  **F** Also, every place is nearby even the canteen is very close. I can go directly.  question 4: in your opinion, what are the design aspects of these spaces that you feel affecting you positively?  In nc hostel I like the rooms... the building… **F** I can go down directly form the lift. Everything is nearby.  **A** In maqam 4, I like that there is no sound. I do not hear people walking in the corridor. In nc hostel I can hear everything even the room beside me. There is no soundproof, but in maqam 4 there is soundproof.  J At home, the lighting is better.  In maqam 4, it is good that the curtain does not allow the light comes in when I want to sleep.  question 5: in your opinion, what are the design aspects of these spaces that you feel affecting you negatively?  In nc hostel, there is sounds. For example, in weekends, if I want to sleep afternoon, I can not because girls are walking and the room adjacent to me has a sound. Even sometimes ta night, when ladies playing music, it is hearable in rooms. In maqam 4, it is… the light is not nice. The place is dull, it is like it is obsolete. In corridors, everywhere, it is like it is obsolete. At home, the lighting is good. It is enough without the need to switch on the table lamp, I can study. It is something good. In nc hostel and maqam 4, I have to have table lamp. In nc hostel, the lighting is very very low. If I want to study at night, I can not because there is only one light in whole room, and it is not strong. |
| 11 | I feel the home is ….. the atmosphere is depressing. I am living all my life here, so there is a need for a change.  In maqam 4, although  **A** it is sound insulting and there is concentration, but I feel  **C** the atmosphere is depressing because the colors are dull generally in the hostel. In nc hostel, I feel energetic little more than in maqam 4 because of the colors. In maqam 4, the colors are little dark more than in nc hostel. Also,  **F** **it is near to almost everything**. In maqam 4, they are little restricted such as for receiving orders, going out with friends.  question 4: in your opinion, what are the design aspects of these spaces that you feel affecting you positively?  **G** I do not see that much difference between home and the hostel, but the aspects  I feel the hostel makes the student depend on herself. She is living in a room alone, and she takes care of herself. This is what affects me positively; I depend on myself. I have a room that I have to clean, take care of organizing it. No one taking care of it instead of me.  question 5: in your opinion, what are the design aspects of these spaces that you feel affecting you negatively?  At home, because I am living in this home since my birthday. I used to it, so there should be a change.  Maqam 4 because of the dark colors, I see that the colors affecting the psychology and the student’s work and effort. In nc hostel, the light color gives an energy more for the person more than the home and maqam 4. |
| 12 | **F** I was most comfortable in the new campus. The university is closer. In maqam 4, at that time, it was the beginning of corona, so there were no buses. To the library, you take almost 15 min walk and in the sun. it was summertime. The new campus was the best; it is closer and generally the facilities there are more. The food court is closer, the university, the gym, everything is closer. The life is better in the new campus than in maqam 4.  question 4: in your opinion, what are the design aspects of these spaces that you feel affecting you positively?  **H** First thing in the new campus, the window is big. This thing makes me comfortable a lot. At home, my room has a lot of windows. I like when the sun enters to my room. You know, you feel energetic in the morning. You got excited to do things and study.  **C** In maqam 4, as I told you the room was purple, the door was dark brown. I feel it was like dull. It is true that the place there is bigger, but I feel tightened.  J The new-campus is more comfortable even the lights are much comfortable. They on sides in above. Its look is very…I like the new campus more than maqam 4.  question 5: in your opinion, what are the design aspects of these spaces that you feel affecting you negatively?  **I** Negatively, in the new-campus I would say the area. You know, it does not allow for rearranging the bed and desk easily. If you want to put the desk near the pin board, you do not know how. It closes the cabinet or takes much space. You can not walk comfortably. This is the problem.  In maqam 4, the thing that I did not like I think the white light in the bedroom. It was annoying. I feel if it was like the one in the new campus, it will become better.  **At home, the thing that annoying me is that…. I have studying desk, but it is not comfortable like the one in the hostel.** |
| 13 | **A** Psychologically, maqam 4 the first one I did not like it that much. It was very calm to the extent is that…. I was in an online mostly, so I am in a strange place that is uncomfortable. It was very calm; even sound I can not hear any. It was scaring.  **B** Then, when they moved me to the new-campus, the buildings there are in a nice place. When we go down to sit or walk, it was nicer and more comfortable. For the studying also it is good. Although sometimes I hear sound of noise, but I can adopt with it. At home, frankly, it is the best thing.  question 4: in your opinion, what are the design aspects of these spaces that you feel affecting you positively?  Maybe in the new-campus hostel, the weather is good and the design of the hostel is very nice.  **H** The windows are big, allowing sun to enter.  I can hear that people are around me. Maybe because at home, I am used to hear my sisters’ sounds and so on. When I hear the sounds of people around me is much comfortable. Maqam4 is very calm.  **I** It is true that it is bigger, the bedroom was bigger, and it is a good thing,  but the problem is because it is my first time at the university, the place is calm. It is new so it was little difficult for me. Also, the view was affecting, how the sun is entering to the bedroom was not good.  question 5: in your opinion, what are the design aspects of these spaces that you feel affecting you negatively?  J As I said, in Maqam 4, the white lights was there. In my bedroom, there was white light, and it was annoying. I do not like the white light in the bedroom. When I want to study, I do not like it. This makes me switching off the lights, and opens my laptop to study. Even in the new-campus hostel, the light is kind of white. I do not feel comfortable with it. But in the new-campus, it was dark also, the light is very low to study on it. The same in maqam 4.  At home, I am comfortable with everything. If there is something negative at home, it will be maybe, I do not take much time for studying. I forget my studying for a while. From time to time, someone calls me and so on, but when I want to have my space, they allow me. |
| 14 | Psychologically, in the new campus it was depressing. It is true there is crowd but still depressing. In Maqam 4, there were no feelings; it is OK. The situation was normal. AT home, it was nice. Feelings were nice.  question 4: in your opinion, what are the design aspects of these spaces that you feel affecting you positively?  **D** I feel the garden, only the garden. Wait, I do not know. Only the garden.  question 5: in your opinion, what are the design aspects of these spaces that you feel affecting you negatively?  A The noise, there is no sound insulation. This was in the new campus. In Maqam 4, the sound insulation is also a problem. It is so calm. |
| 15 | food is near. Everything is available. Whereas I am in the hostel, I have to go to the canteen in a specified times before it closes, before it becomes crowd. For example, if I want something, I go to the supermarket. This requires time. At home, it is opposite, it is more comfortable. Everything is available, so I do not waste time.  question 3.1: and if we compare Maqam 4 with the new campus, where you felt better?  **F** Mmm, I think in the new campus because it is close to the canteen. I can go to the canteen and comeback to the room in shorter time, and also you do not feel tired. When you walk from Maqam 4 to canteen, you reached little tired from waking. The new campus is more comfortable at this point. Even, with the classes, I go before the class by five minutes to reach, but in Maqam 4 I go before ethe class by ten minutes or a quarter.  question 4: in your opinion, what are the design aspects of these spaces that you feel affecting you positively?  **G** Positively, mmm. Maybe the study tables because it is like the study table I have at home. In the new campus, the board at the wall, where we can stick our notes, was very useful.  J In maqam 4, the lighting was very helpful for studying and without studying, but in the new campus, the lighting is little dim. At home, the room itself, the comfort level like this.  question 5: in your opinion, what are the design aspects of these spaces that you feel affecting you negatively?  A In the new campus, the noise especially at night and the lighting, whereas in maqam 4, I feel nothing, and also at home nothing.  **F** Maqam 4, only the distance, it is far. |

## Categorization of codes: Main design factors affecting students’ psychological well-being.

| *Common perceptions* | *Main design factors* | *Main described feelings* |
| --- | --- | --- |
| *“I cannot concentrate easily. The NC hostel is a calm place. There almost we are all after the basic first academic year, so at the study time, all are silent and calm. Very rarely to feel noisy.”*  *“The insulation of Maqam 4 is very nice* *even if one of my friends come in, we do not hear the noise outside. We study and we are all concentrating in the space. In NC hostel, I was able to study in it, but the noise outside was interfering the clam place if I made for myself a study mood. Th noise outside makes me not concentrating in the study. So Maqam 4 wins for the study and comfort there”*  *the noise that can be heard. Girls in the university are staying awake till the dawn. You feel noise little, it can be heard.”*  *“You can focus the first thing, and the place there is calm. Your concentration mostly is towards studying not playing.* *it is calm, and if there was a crowd in the corridor for example, it cannot be heard from inside the bedrooms. In the new-campus hotel, everything can be heard”*  *“in maqam 4 because of the calmness, I feel I want to study. It is calm. I cannot do anything except studying”*  *“In the NC hostel, the privacy is little week. There is no insulation.”*  *“In the new campus, there is no sound insulation. I feel there is no privacy. Sometimes, when I talk with my family by phone or with anyone, I need a privacy. The girl in the adjacent room if she was in the bathroom or in her bedroom can hear me. This is annoying me and annoying her. It is annoying me, because there are private things; I do not want someone to hear, and she can hear it. Second thing, she might get annoyed by my voice. This is I see it not okay”*  *“In the new campus, the noise especially at night”*  *“I have brother and sisters and they were making too much noise and need help. This makes me slow in my study. Whereas in maqam 4, it was very clam.”*  *In the Nc hostel, the rooms can be heard from outside, there is nothing to insulate the sound. If I talked, my neighbor would hear me.”*  *“In maqam 4, I like that there is no sound. I do not hear people walking in the corridor. In nc hostel I can hear everything even the room beside me. There is no soundproof, but in maqam 4 there is soundproof.”*  *In nc hostel, there is sounds. For example, in weekends, if I want to sleep afternoon, I cannot because girls are walking and the room adjacent to me has a sound. Even sometimes ta night, when ladies playing music, it is hearable in rooms.”*  *“it is sound insulting and there is concentration”*  *“Psychologically, maqam 4 the first one I did not like it that much. It was very calm to the extent is that…. I was in an online mostly, so I am in a strange place that is uncomfortable. It was very calm; even sound I can not hear any. It was scaring.” + “I can hear that people are around me.* *Maybe because at home, I am used to hear my sisters’ sounds and so on. When I hear the sounds of people around me is much comfortable. Maqam4 is very calm.”*  *the problem is because it is my first time at the university, the place is calm. It is new so it was little difficult for me.”*  *“The noise, there is no sound insulation. This was in the new campus. In Maqam 4, the sound insulation is also a problem. It is so calm.”* | Presence/absence of Sound insulation A | Concentration  Privacy  Comfort |
| *“In Maqam 4 I was still new student. I was still feeling afraid from the beginning. I was not knowing anyone. In NC hostel, the girls were very nice. If they saw a girl sitting alone, and they were doing something, they invite the others.”*  *“In nc hostel, there the movement was more. There are many girls walking, eating, playing. It was very nice atmosphere.”*  *“in Maqam 4 I was just now the first time I am entering to hostel and being away from my family. I was sitting there a month. So it was too much on me, so I was feeling the difficulty. But thanks God, I am very comfortable. In new campus hostel, I have my friends with me in the same building. There are few rooms among us. I do not know. I feel the comfort.”*  *“In Maqam 4, I was not seeing humans. They are mostly online, and my friends all were online except me. I was almost alone.”*  *“I can be with my friends more. Not like maqam 4, you can be with your friend more in nc hostel.”+ “in nc hostel, also you feel you like to study as well. They all get excited and study down.”*  *“In nc hostel. Because all my friends there. We sit together in the lounge that is in the floor and study. It is better. Sometimes like in weekends, the girls make some activities like football or volleyball.”*  *“When they moved me to the new campus, the buildings there are in a nice place. When we go down to sit or walk, it was nicer and more comfortable”* | Supportive/unsupportive communal spaces for social interaction B | Lonely B |
| *“The rooms in the NC hostel are white; their colors are light.”*  *“In Maqam 4 hostel, the colors are very dark. They are very, very dark. The rooms are pink. The curtains are pink. The table is brown. The doors are brown. You understand. The things, whatever the light is strong, still the room is depressing.”*  *“The NC hostel helps a lot because the colors are very light and motivates us for studying”*  *“The room, because I am little biased towards the light colors such as, yellow, blue, baby blue, and others and not for the pink, the colors in building 16, the room was violet or pink; I do not like these colors, and the curtain was also pink. I was not like it. I entered building 13, the curtain was nice, and the place was nice. In building 14, I had been quarantined because I was of the contacts for COVID positive case, and frankly the building wins in Maqam 4. The rooms are very very light. The color is light. The curtain is light.”*  *“What annoying me little is the dark colors. For example, as I told you the pink colors and pink curtain in Maqam 4. It was not all one solid dark color. No, it was like decorated, but it was pink. It was annoying. The bathrooms in Maqam 4 also were dark. It was the dark burnt brown, so it was little annoying me. The dark colors annoy me little.”*  *“The place in the new campus; the white color is motivating. The while color makes you feel comfortable. When I pass in the corridor, I was not feeling afraid as I was feeling afraid in the corridor of Maqam 4. In Maqam 4, when I was passing in the corridor, I was running to reach my room because I feel the brown color is scary.”*  *“I feel the light colors when they are available in a place, the place becomes very comfortable. You feel comfortable, but when the colors of a place are dark.. the colors of my room at home are light, and I have a big window. I have a desk and bed. My furniture are all white, and the walls are very light pink, even sometimes you feel it white. Therefore, I prefer the light colors because the place when I feel comfortable in I feel it should be with light colors. I do not like dark colors at all, because the light colors you feel comfortable. A place when you enter and see its light colors is different from a place with dark colors like brown.”*  *“I see the design of the new campus is nicer. How they put the white color, how they make beds in brown color.* *But the maqam 4 what I do not like in it is that they make the bathrooms with pink color. I did not feel it is nice.*  *in maqam 4 I did not like the interior colors”*  *“The atmosphere is depressing because the colors are dull generally in the hostel. In NC hostel, I feel energetic little more than in maqam 4 because of the colors. In maqam 4, the colors are little dark more than in NC hostel.” + “Maqam 4 because of the dark colors, I see that the colors affecting the psychology and the student’s work and effort. In NC hostel, the light color gives an energy more for the person more than the home and maqam 4.”*  *“In maqam 4, as I told you the room was purple, the door was dark brown. I feel it was like dull. It is true that the place there is bigger, but I feel tightened.”* | lightness /Darkness of used interior colors C | Depression  Comfort |
| *“The greenery is everywhere, whenever you turn your head, you see greenery”*  *“I loved the gardens, because I was studying a lot outside, and there are tables with chairs. I was studying there and felt the studying mood is there.”*  *“The only good thing I feel the garden, only the garden”*  *“The greenery outside is nice. It has a nice impact. When you open the window, you find green views.”*  *“The view was not nice in maqam 4, because the view was on a sand. But in the new campus, the view was on the trees and plants and buildings.”* | Exposure/ restriction to natural views D |  |
| *“Even the lounge space in Maqam 4 is refreshing and it is big”*  *“The first thing is the wide space. I mean look, we in the NC hostel rearrange the desk and the bed locations a lot to make the room becomes wider.”*  *“The place is wide, and it helps me for all moods. The NC hostel is little narrow.”*  *“The bathroom is narrow. The sink where I sink my face is bigger than the bathroom inside.”*  *“In maqam 4, (I)the bedrooms are little wide, but in new campus, they are very small. Because of its small size, each time I pass by something, I get back home, my legs are blue because I hit the things in the room. Because it is very very small.”*  *“For maqam 4, as a design we can say the design of the room. It is nice. It is small, but you do not feel it too small. You feel the bed and cupboard are in places make the room still have a space. The space is not too much compacted. For the new-campus hostel, the design is not that much”*  *“The room in new campus is little narrow. The cupboard I do not know how it is. wherever you put your hand in a place you hit your hand. In maqam 4, the place is organized well.”*  *“Second thing is that the size of the room is small, but in maqam 4 it is bigger. But how they designed the cupboard, beds I like it”*  *“Negatively, in the new-campus I would say the area. You know, it does not allow for rearranging the bed and desk easily. If you want to put the desk near the pin board, you do not know how. It closes the cabinet or takes much space. You cannot walk comfortably. This is the problem”*  *“It is true that it is bigger, the bedroom was bigger, and it is a good thing”* | Big/small sizes of spaces I |  |
| *“But from the side of lounges and study rooms, Maqam 4 was better. There is lounge space and study room, and the space was on itself.”*  *“Sometimes, the girls bring electrical stove, and they put in the new-campus and cook. The rooms that are adject to the kitchen. because the kitchen is not closed., get hurt from the smell. You get it because the kitchen is not closed, but in maqam, there is a closed kitchen.”*  *“We in the new campus have no study area. I was very benefit from the study area; sometimes I do not want to sit in the bedroom. I want to change, so I go and sit in the study area. new-campus hostel has no study area. There is a place for sitting, but I feel it is not comfortable. Girls are passing.”* | Closed/opened communal spaces E |  |
| *“The availability of the library near to the NC hostel is a nice thing. When I want to change my mood of study, I go to the library to study.”*  *“Maqam 4, although the place is little far, and scary a little because it is far from the university and collages”*  *“Absolutely, the home, because it is easier. At home, the comfort is more than in the hostel because for example, the food is near. Everything is available. Whereas I am in the hostel, I have to go to the canteen in a specified times before it closes, before it becomes crowd. For example, if I want something, I go to the supermarket. This requires time. At home, it is opposite, it is more comfortable. Everything is available, so I do not waste time.”+ “the new campus because it is close to the canteen. I can go to the canteen and comeback to the room in shorter time, and also you do not feel tired. When you walk from Maqam 4 to canteen, you reached little tired from waking. The new campus is more comfortable at this point. Even, with the classes, I go before the class by five minutes to reach, but in Maqam 4 I go before ethe class by ten minutes or a quarter.”*  *“Maqam 4, only the distance, it is far.”*  *“In the NC hostel, everything is close to each other. The canteen is nearby. The food court is near. The gym is near. No need to walk too much like I was walking when I was in maqam 4.”*  *“Also, every place is nearby even the canteen is very close. I can go directly”* *I can go down directly form the lift. Everything is nearby.”*  *“it is near to almost everything”*  *“I was most comfortable in the new campus. The university is closer. In maqam 4, at that time, it was the beginning of corona, so there were no buses. To the library, you take almost 15 min walk and in the sun. it was summertime. The new campus was the best; it is closer and generally the facilities there are more. The food court is closer, the university, the gym, everything is closer. The life is better in the new campus than in maqam 4.”* | Long/short distances to nearby facilities F | Comfort |
| *“At home, if I could have a space alone, because we are a very big family, so it is rarely to have an empty room at home to study in alone.”*  *“The Aspects at home, I like studying at the desk, and this is available in the NC hostel; every student has her desk alone in her room.”*  *“Maqam 4 is more than the new- campus from many aspects. First aspect there is no sharing”*  *“Maybe the study tables because it is like the study table I have at home. In the new campus, the board at the wall, where we can stick our notes, was very useful.”*  *“The rooms also motivate us for studying. You can sit on it for.. you do not feel the time. The board I can use to put my staff, and the desk besides, so everything is organized”*  *“I feel the hostel makes the student depend on herself. She is living in a room alone, and she takes care of herself. This is what affects me positively; I depend on myself. I have a room that I have to clean, take care of organizing it. No one taking care of it instead of me”* | Availability/ unavailability of private individual spaces G | Privacy |
| *“The lighting: this is the thing that NC hostel missing. There is not too much light in the room. When the sun sets, we depend on a very small amount of light.”*  *“at home, the windows are very big; I like the space having too much natural light.”*  *“First thing in the new campus, the window is big. This thing makes me comfortable a lot. At home, my room has a lot of windows. I like when the sun enters to my room. You know, you feel energetic in the morning. You got excited to do things and study.”*  *“The windows are big, allowing sun to enter”*  *the view was affecting, how the sun is entering to the bedroom was not good.”* | Plenty/lack of natural light H |  |
| *“The negative thing is that in most rooms the lighting is dim, and it never helps for studying. The lighting of the bathroom is stronger than the lighting in the room. Sometimes, I have to open the bathroom door to allow more lighting to enter my room or I bring with me some light form home to increase the lighting of the room. Maqam 4 no, it was very good. It was good form the aspect of lighting, it is very strong, and it helps for studying”*  *“The lighting. It was the weakest in the new-campus hostel. I am kind of person when I feel the room is very well lit; I feel good.”*  *“You feel the room is not that much for studying. It encourages sleep. May be because of the lighting”*  *“In the new-campus, I did not like the lighting because it is very simple, light; you must bring light form home”*  *“In maqam 4, the lighting was very helpful for studying and without studying, but in the new campus, the lighting is little dim”*  *“At home, the lighting is better.”*  *“In maqam 4, it is… the light is not nice. The place is dull, it is like it is obsolete. In corridors, everywhere, it is like it is obsolete. At home, the lighting is good. It is enough without the need to switch on the table lamp, I can study. It is something good. In nc hostel and maqam 4, I have to have table lamp. In nc hostel, the lighting is very very low. If I want to study at night, I can not because there is only one light in whole room, and it is not strong.”*  *“The new-campus is more comfortable even the lights are much comfortable. They are on sides in above. Its look is very…I like the new campus more than maqam 4.”* + “*In maqam 4, the thing that I did not like I think the white light in the bedroom. It was annoying. I feel if it was like the one in the new campus, it will become better.”*  *“in Maqam 4, the white lights was there. In my bedroom, there was white light, and it was annoying. I do not like the white light in the bedroom. When I want to study, I do not like it. This makes me switching off the lights, and opens my laptop to study. Even in the new-campus hostel, the light is kind of white. I do not feel comfortable with it. But in the new-campus, it was dark also, the light is very low to study on it. The same in maqam 4.”* | Brightness/ dimness of artificial lighting J | Concentration |

# Answers for research question (3) How do students perceive an ideal place for living?

## Coded answers for question (e) if you tried to imagine an ideal place for living for university students in the future, how will it be?

| 01 | **I** -It is a building where the rooms are not…. it should at least give the student the comfort to live in the room without the feeling of being squeezed.  **C-**The colors are fresh. Light ranges of colors like beige and white.  J -The lighting is suitable. Not too dim and not too strong.  **D** -The greenery should even if inside the building; you feel there is a green space when you walk, you smell the air and smell of planting.  **B1** There is a space for us as students to sit in when we have an empty time. A TV rooms. A study rooms. The kitchen.  EQP **-**the kitchen now in our hostel has nothing only microwave and the sink of course only. We must bring everything, and when we do not have like students who cannot, they cannot cook. They must eat the canteen food. It is nice to have our kitchen well equipped for students.  G -And, if each student like in NC hostel, I prefer the room system here; the rooms are individual, but the bathroom is shared if there is no space. At least to have a privacy. It is better to have a bathroom for each student, but if there is no space, it is fine to be shared with someone I know. Not anyone.  **B2**-And the most thing I had trouble within the hostel is that there are many nice spaces to study in, but the internet is not reaching them, so you feel you can not sit in this space because there is not internet. You cannot study. So, you are forced to sit in the room to study.  sub question 6.1: ok, is there any kind of spaces you are missing in the hostels, and you like to have them available?  Of course, **B3**-the study rooms are the most thing I am missing.  **E-** Currently, when we want to study, we sit in any lounge space we find it empty, and people passing they see you studying, and not all of them becomes silent or lower their voices. It is nice to have study rooms away from our bedrooms because the bedrooms by themselves they encourage sleeping. The productivity will be more if there are study rooms with coffee corner. Somethings excite |
| --- | --- |
| 02 | **D** Mmm. I feel like if it was for me I will make it all with windows. I can see the nature outside. Our university has a very nice nature around the NC hostel and also in Maqam 4; there is a very nice nature. The windows make you unable to see the nature a lot especially the weather of Al Ain city in winter is very nice. And already the university specify for us places for doing barbeque; therefore, I feel I want a place has windows in most of it. The place where I live for studying has windows mostly. The bedroom is a simple place with windows. The bed is like it is now. I am satisfied to have it of its small size and the desk as well, but there are windows to see the nature more. That it is. I do not feel there is something else.  Sub-question 6.1: and what about for studying, how you imagine this building must be to help you studying more comfortable?  *A* It is isolating all outside sounds. Our bedrooms are like the bedrooms in Maqam 4.  In Maqam 4, the lounge space has longitudinal windows, so I can see outside and above this all  there is sound isolating that helps me studying.  **I** -The place is wide,  sound isolating, calm, and  there is nature I can see.  **D -**Just the only negative thing is that the windows of the lounges in Maqam 4 cannot be opened, so there is no ventilation. I am from the people who like studying in Al Fajir time, but I cannot open the windows to hear the birds sounds in the morning while I am studying, and a cold air comes in. so I feel it should be an isolating space and has a ventilation; I can allow the air to enter, and wide. This is for studying for me. |
| 03 | A- First things, the place has a privacy. I mean no sounds. Second thing, there should be a place has privacy and calmness to make the student able to study, sleep, talk and he is comfortable. Not taking care of being annoyed. Now, sometime, I become worried. When I open the laptop, I do not want to wear headphone, I want to hear the lecture without headphone. I can not do this, because I can not. The girl adjacent to my room will be able to hear, so I do not want to bother her. I became worried to not bother her. I feel the sound insulation is very important.  **B3** -There should be a study area.  question 6.1: what about the shape and look of the building?  **EXT-1** I feel modern can suits everyone. The modern style; something simple and nice, and  **C** light colors to make the student feel comfortable while he is studying. |
| 04 | **B1-I** will say first thing I feel the idea of having a notice board to put on it notifications such as, today there is a maintenance or party or anything as a contact between students themselves in the building.  **E** Second, there is a kitchen in each floor closed and has a fan for the smells. It is not open.  For the rooms, the rooms are okay, but  **B1** -it will be nice to have a gathering room so when we meet or watch tv to have a movie night.  **C** -About the colors, I feel that it will be nice for the rooms to have little colors. pastel colors or on the walls to feel the place.  question 6.1: do you feel there is a kind of places that you are missing in your current hostels and wish to have in the future building?  **EQP-**The kitchen. There is no place to cook in. there is a kitchen but it has nothing. There is just a microwave. There is no oven or anything else. So the most thing I feel annoying is the kitchen. |
| 05 | From my point of view, it will be not similar to maqam 4 neither new campus.  **B3** Place motivates the student that she is at home. For example, there is a pantry. We are too many and we stay for weeks there.  The bathroom is in a way that the student can be comfortable and not get annoyed.  **I** The room is little wide. A place to put her staff.  You feel like you are at home. For example, I do not know if you saw before the hostel of Khalifa university. There, the hostel is like apartments. Apartment system; in the apartment I think three bedrooms and a lounge, study room, an kitchen. I feel like the person is in his home.  You do not feel like you are in a narrow place and became worried.  question 6.1: from the design point of view, how will you imagine its shape?  **EXT-2** I feel it is a tall building and wide.  **EXT.** Its shape from outside is not scary, no. if someone saw it from outside, he will notice that it is s university hostel. **B3-**The point is the feeling inside is like you are at home rather than in a university. You feel you are at your own home to not feel strange or you are in a far place. You have everything like kitchen, laundry. You do not have to go up and down or to wait by raw. Everything is available. |
| 06 | **I** For example, you widen the areas of the bedrooms little, and  A you make a sound insulation between the rooms. This is the most important thing to make the student concentrate on his studying and can stay there.  **D** Also, you should focus on the view. For example, there is a courtyard in the middle.  question 6.1: do you feel there is a kind of places that you are missing in your current hostels and wish to have in the future building?  **E** You can make…. look now the existing living area in the new-campus is open, so I felt not nice. It is better to be a closed room for the girls to be comfortable in it. Second thing, even there is no closed kitchen. The kitchen is open to the rooms, and the smell reaches the rooms. So if it was closed, it is better.  For example, you widen the corridors. I felt it very narrow.  **EXT-2** From outside, for example, you use geometrical shapes and play with the facades, and it is not like a square or rectangle or L letter or U letter.  **EXT-3** You can play a little with the exterior design. Make it colorful for example. |
| 07 | **I** In my opinion, the room should be bigger because in the new campus and also in maqam 4, the room is little narrow. The room if it can be bigger, and the bathroom, if it can be bigger little.  J The lighting is affecting especially at study time.  A- The sound insulation among rooms because there are many girls, too much walking and going out, so it is too much affecting especially at study time when it is online. I feel this is the most important thing.  question 6.1: what about the shape and look of the building?  **D** In my point of view, I feel the most important thing is the greenery, the plants, and the furniture. Theses are the most affecting things on a place. They give the place more beauty and comfort.  question 6.2: do you feel there is a kind of places that you are missing in your current hostels and wish to have in the future building?  mm. I feel nothing except  **B2**- places for studying outside. It would be better, because there are chairs away from each other but not for studying. We already bring tables from inside to outside or make a sitting area if someone studies. |
| 08 | Honestly, I would imagine it like the NC hostel, same design, but with more modifications. In bathrooms, my neighbor, if she was not my friend and was someone I do not know, she can access my room with a card or a coin. And  **A**- they make sound insulation. And  **E** they make the kitchen a separate place because when they put something in the microwave, the smell comes to my room.  I feel it would be like maqam 4 and nc hostel, mixed between these two. In nc hostel also the lift, I was in the fifth floor if I want to go up, it goes to third level then to ground then comes to me. I was vey late to reach up.  question 6.1: do you feel there is a kind of places that you are missing in your current hostels and wish to have in the future building?  **D** The gardens and **B3-**cafes and supermarkets. I imagine them in the new building. Now, I am at home, I am missing the gardens of the hostel.  question 6.2: what about the shape and look of the building?  FY-imagine it similar to maqam 4 hostel. The same layout, it occupies too many rooms and less space. |
| 09 | I feel it would be similar to the nc hostel rooms from inside, but  **B1_**I feel they have to add study room like in maqam 4. There is a study room there, it was motivating me as well with the other girls**.** Or you are studying in a place where other girls are studying as well.  B3- There is kitchen, study rooms, lounges; it is similar to nc hostel, but the kitchen is a real kitchen and lounge areas.  question 6.1: what about the shape and look of the building?  **EXT-**As a look, I feel same like nc hostel. It looks comfortable; it is showing that it is a hostel for university students. The logos of the buildings everywhere explains that it is a university hostel.  **EXT-3**- Also the colors, it shows that it is something not formal; it is a university hostel.  question 6.2: do you feel there is a kind of places that you are missing in your current hostels and wish to have in the future building?  The swings.. I feel if they make it.. I feel everyone will like it. It is not for kids, so it is nice to have it.  **B3-** I feel if they make restaurants only for the hostel. Because there is not nearby restaurants only supermarket and we can order from outside also. |
| 10 | FY -I feel all rooms should be nearby lift not like some rooms are far to not pull the bags and so on especially if I am brining a fridge or something to pull it.  The curtain should not let the light come in, and  J -the lighting should be good and  A- there is soundproof if I want to study, there is no noise.  question 6.1: what about the shape and look of the building?  **EXT-2-**I feel the look of nc hostel is nice. It is straight. I like these shapes squares and rectangles.  question 6.2: do you feel there is a kind of places that you are missing in your current hostels and wish to have in the future building?  Yes, if there is a fridge in each room because the staff are stolen form the fridge of the hostel. In nc hostel, the ac is very cold. If I switched off it is hot, if is switched it on, it become very very cold. In maqam 4, the ac is good. |
| 11 | G -Initially, I feel every person has own room not shared rooms with bathroom. A room and bathroom for every person.  A-There is sound insulation.  The cabinet, corridor, and desk of course. **C** -The colors are light.  question 6.1: do you feel there is a kind of places that you are missing in your current hostels and wish to have in the future building?  No honestly, I feel normal. Everything is available.  question 6.2: what about the shape and look of the building?  FY -I feel like U shape to occupy more rooms.  **I** -And its area is big. |
| 12 | **EQP-**I imagine it first thing is the kitchen. It should be different than the exiting one. You know in corona time, we sat for a month and return home a week, and in Ramadan as well… there should be a cook or oven to make things.  G -In the bedroom, I like it very much. I do not see anything to be changed. The bathroom as well.  Especially the idea of one bathroom for every two rooms is better than on bathroom for multiple rooms.  In maqam 4, nothing is in mind for maqam 4.  **B3**- I want to have studying rooms or studying halls,  **B2**- you know in the exam time when I want to study, I do not have mor than my desk in the room. I want to go other space. Sitting outside, I want a table. I want a chair.  **B3**- The hall is different than the atmosphere the room. So other place to study in. That is the most thing I have it as a problem.  question 6.1: do you feel there is a kind of places that you are missing in your current hostels and wish to have in the future building?  I feel everything is good. **B3-**You know especially, if I want to say grocery or café.. it is available in some buildings, and it is OK. I see it very nice.  question 6.2: what about the shape and look of the building?  **EXT-4** From outside, I want the windows to be clear... each room with its own window that is suitable for it. Not small ones. D- For me, if you open the curtain, the whole atmosphere of the room is changed.  **EXT-2-**I feel it should not be too much big as number of floors. Three to five is reasonable. Not more.  FY **-The entrances I feel to be in clear places. Now we have in the new campus if you see... A1 you entered it from far hidden entrance. You have to turn around. You know the shape of each building is like square and the entrance is inside. Sometimes, when I go to other buildings, I turn around the whole building to look for the entrance.** |
| 13 | **D** -Honestly, I feel the landscape outside to be good for the psychological being, so the one wants to go outside.  **B2-** Because staying in the bedroom always for studying is hard. Sometimes if I go out and there are places with tables and chairs, it is good instead of bringing from inside from my bedroom or from the lobby the chairs and the stuff.  **A**-In the new-campus, I can hear everything, everything is happening in the world I can hear it. So, if the building has a little f soundproof, it would be better.  question 6.1: do you feel there is a kind of places that you are missing in your current hostels and wish to have in the future building?  **B2-** Yes, there is a place I love to sit in in maqam 4, place with tube and has plants in it near building 5 , behind it. I love sitting there, because it is an open space and at the same time, there are trees and nice view, but the problem, the chair is uncomfortable. The benches in maqam 4 are good, I feel comfortable with, but in the new campus are hard, they are rigid little. For someone who wants to study outside it is difficult.  question 6.2: what about the shape and look of the building?  Mmmm. **EXT-4**I feel like… what I imagine is the windows are many.  New-campus is perfect for me till now. It is the most comfortable for me till now, and I could used to it. Although sometimes, I got lost because buildings are the same shape, but it is much better than maqam 4 honestly. |
| 14 | I feel it looks like the new campus, but **I** -the rooms are bigger,  and A-there is a sound insulation.  **EQP-**And the kitchen to be like the kitchen in maqam 4. I do not know how to explain; it has a fridge working properly and cook.  **E** -and it has closed lounges, the lounge in new campus is open adjacent to the kitchen.  question 6.1: do you feel there is a kind of places that you are missing in your current hostels and wish to have in the future building?  **B3-**I feel something like a small library for studying and printing; instead of going to the main library in the university to print.  question 6.2: what about the shape and look of the building?  I do not know, something nice not bad.  **EXT-3**-Special colors, decoration, wait... I do not know. It looks special not only a normal empty wall.  EXT-4-It had many windows. I like building with glass facades. It will look nice. |
| 15 | **I** In my opinion, the room should be bigger because in the new campus and also in maqam 4, the room is little narrow. The room if it can be bigger, and the bathroom, if it can be bigger little.  J The lighting is affecting especially at study time.  A- The sound insulation among rooms because there are many girls, too much walking and going out, so it is too much affecting especially at study time when it is online. I feel this is the most important thing.  question 6.1: what about the shape and look of the building?  **D** In my point of view, I feel the most important thing is the greenery, the plants, and the furniture. Theses are the most affecting things on a place. They give the place more beauty and comfort.  question 6.2: do you feel there is a kind of places that you are missing in your current hostels and wish to have in the future building?  mm. I feel nothing except  **B2**- places for studying outside. It would be better, because there are chairs away from each other but not for studying. We already bring tables from inside to outside or make a sitting area if someone studies. |

## **Categorization of codes: Main characteristics of an ideal hostel-built environment.**

| PERCEPTIONS | CHARACTERISTICS |
| --- | --- |
| *“It is a building where the rooms are not…. it should at least give the student the* ***comfort*** *to live in the room without the feeling of* ***being squeezed****.”*  *“The room is little wide. A place to put her staff.”* **+** “*You do not feel like you are in a narrow place and became* ***worried****”*  *“For example, you widen the areas of the bedrooms little”* **+** *“For example, you widen the corridors. I felt it very narrow.”*  *“In my opinion, the room should be bigger because in the new campus and also in maqam 4, the room is little narrow. The room if it can be bigger, and the bathroom, if it can be bigger little.”*  *“And its area is big”*  *“the rooms are bigger”* | Spacious sizes of spaces **I** |
| *“The colors are fresh. Light ranges of colors like beige and white”*  *“Light colors to make the student feel comfortable while he is studying.”*  *“About the colors, I feel that it will be nice for the rooms to have little colors. pastel colors or on the walls to feel the place.”*  *“The colors are light.”* | Light ranges of Interior colors **C:** |
| *“The lighting is suitable. Not too dim and not too strong.”*  *“The lighting is affecting especially at study time.”*  *“the lighting should be good”* | Suitable Artificial lighting J: |
| *“The greenery should even if inside the building; you feel there is a green space when you walk, you smell the air and smell of planting.”*  *“In my point of view, I feel the most important thing is the greenery, the plants, and the furniture. These are the most affecting things on a place. They give the place more beauty and comfort.”*  *“The gardens. Now, I am at home, I am missing the gardens of the hostel.”*  *“I feel the landscape outside to be good for the psychological being, so the one wants to go outside.”*  *“Mmm. I feel like if it was for me I will make it all with windows. I can see the nature outside. Our university has a very nice nature around the NC hostel and also in Maqam 4; there is a very nice nature. The windows make you unable to see the nature a lot especially the weather of Al Ain city in winter is very nice. And already the university specify for us places for doing barbeque; therefore, I feel I want a place has windows in most of it. The place where I live for studying has windows mostly. The bedroom is a simple place with windows. The bed is like it is now. I am satisfied to have it of its small size and the desk as well, but there are windows to see the nature more. That it is. I do not feel there is something else.” + “In Maqam 4, the lounge space has longitudinal windows, so I can see outside” + “there is nature I can see.” + “Just the only negative thing is that the windows of the lounges in Maqam 4 cannot be opened, so there is no ventilation. I am from the people who like studying in Al Fajir time, but I cannot open the windows to hear the birds sounds in the morning while I am studying, and a cold air comes in. so I feel it should be an isolating space and has a ventilation; I can allow the air to enter, and wide. This is for studying for me.”*  *“Also, you should focus on the view. For example, there is a courtyard in the middle”*  *“For me, if you open the curtain, the whole atmosphere of the room is changed.”*  *“And the most thing I had trouble within the hostel is that there are many nice spaces to study in, but the internet is not reaching them, so you feel you cannot sit in this space because there is not internet. You cannot study. So, you are forced to sit in the room to study.”*  *“Places for studying outside. It would be better, because there are chairs away from each other but not for studying. We already bring tables from inside to outside or make a sitting area if someone studies.”*  *“You know in the exam time when I want to study, I do not have mor than my desk in the room. I want to go other space. Sitting outside, I want a table. I want a chair.”*  *“Because staying in the bedroom always for studying is hard. Sometimes if I go out and there are places with tables and chairs, it is good instead of bringing from inside from my bedroom or from the lobby the chairs and the stuff.”* **+** “*there is a place I love to sit in in maqam 4, place with tube and has plants in it near building 5 , behind it. I love sitting there, because it is an open space and at the same time, there are trees and nice view, but the problem, the chair is uncomfortable. The benches in maqam 4 are good, I feel comfortable with, but in the new campus are hard, they are rigid little. For someone who wants to study outside it is difficult.”* | Exposure to natural views **D:** |
| *“There is a space for us as students to sit in when we have an empty time. A TV rooms. A study rooms. The kitchen”*  *“But it will be nice to have a gathering room so when we meet or watch tv to have a movie night.”*  *“I feel they have to add study room like in maqam 4. There is a study room there, it was motivating me as well with the other girls. Or you are studying in a place where other girls are studying as well.”*  *“I will say first thing I feel the idea of having a notice board to put on it notifications such as, today there is a maintenance or party or anything as a contact between students themselves in the building.”* | Availability of communal spaces encouraging social interaction **B1:** |
| *“Place motivates the student that she is at home. For example, there is a pantry. We are too many and we stay for weeks there*.” **+** “*The point is the feeling inside is like you are at home rather than in a university. You feel you are at your own home to not feel strange or you are in a far place. You have everything like kitchen, laundry. You do not have to go up and down or to wait by raw. Everything is available.”*  “*The study rooms are the most thing I am missing”*  *“There should be a study area”*  *“Cafes and supermarkets. I imagine them in the new building”*  *“There is kitchen, study rooms, lounges”* **+** *“I feel if they make restaurants only for the hostel. Because there is not nearby restaurants only supermarket and we can order from outside also.”*  “*I want to have studying rooms or studying halls, The hall is different than the atmosphere the room. So other place to study in. That is the most thing I have it as a problem.”* **+** *“You know especially, if I want to say grocery or café”*  *“I feel something like a small library for studying and printing; instead of going to the main library in the university to print.”*  *“The kitchen now in our hostel has nothing only microwave and the sink of course only. We must bring everything, and when we do not have like students who cannot, they cannot cook. They must eat the canteen food. It is nice to have our kitchen well equipped for students.”*  *“The kitchen. There is no place to cook in. there is a kitchen but it has nothing. There is just a microwave. There is no oven or anything else. So the most thing I feel annoying is the kitchen.”*  *“I imagine it first thing is the kitchen. It should be different than the exiting one. You know in corona time, we sat for a month and return home a week, and in Ramadan as well… there should be a cook or oven to make things.”*  *“And the kitchen to be like the kitchen in maqam 4. I do not know how to explain; it has a fridge working properly and cook.”* | Availability of nearby basic facilities for daily needs **B3** |
| *“And, if each student like in NC hostel, I prefer the room system here; the rooms are individual, but the bathroom is shared if there is no space. At least to have a privacy. It is better to have a bathroom for each student, but if there is no space, it is fine to be shared with someone I know. Not anyone”*  *“Initially, I feel every person has own room not shared rooms with bathroom. A room and bathroom for every person.”*  *“In the bedroom, I like it very much. I do not see anything to be changed. The bathroom as well. Especially the idea of one bathroom for every two rooms is better than on bathroom for multiple rooms.”* | Availability of private individual spaces G |
| *“Currently, when we want to study, we sit in any lounge space we find it empty, and people passing they see you studying, and not all of them becomes silent or lower their voices. It is nice to have study rooms away from our bedrooms because the bedrooms by themselves they encourage sleeping. The productivity will be more if there are study rooms with coffee corner. Somethings excite”*  *“Second, there is a kitchen in each floor closed and has a fan for the smells. It is not open.”*  *“look now the existing living area in the new-campus is open, so I felt not nice. It is better to be a closed room for the girls to be comfortable in it.* *Second thing, even there is no closed kitchen. The kitchen is open to the rooms, and the smell reaches the rooms. So if it was closed, it is better.”*  *“They make the kitchen a separate place because when they put something in the microwave, the smell comes to my room.”*  *“and it has closed lounges, the lounge in new campus is open adjacent to the kitchen.”* | Enclosure of certain communal spaces **E** |
| *“It is isolating all outside sounds.” +“There is sound isolating that helps me studying”+ “sound isolating, calm”*  *“First things, the place has a privacy. I mean no sounds. Second thing, there should be a place has privacy and calmness to make the student able to study, sleep, talk and he is comfortable. Not taking care of being annoyed. Now, sometime, I become worried. When I open the laptop, I do not want to wear headphone, I want to hear the lecture without headphone. I can not do this, because I can not. The girl adjacent to my room will be able to hear, so I do not want to bother her. I became worried to not bother her. I feel the sound insulation is very important.”*  *“you make a sound insulation between the rooms. This is the most important thing to make the student concentrate on his studying and can stay there.”*  *“The sound insulation among rooms because there are many girls, too much walking and going out, so it is too much affecting especially at study time when it is online. I feel this is the most important thing.”*  *“They make sound insulation”*  *“There is soundproof if I want to study, there is no noise”*  *“There is sound insulation”*  *“In the new-campus, I can hear everything, everything is happening in the world I can hear it. So, if the building has a little f soundproof, it would be better.”*  *“there is a sound insulation”* | Presence of sound insulation A |
| *“I imagine it similar to maqam 4 hostel. The same layout, it occupies too many rooms and less space.”*  *“I feel all rooms should be nearby lift not like some rooms are far to not pull the bags and so on especially if I am brining a fridge or something to pull it.”*  *“I feel like U shape to occupy more rooms.”*  *“The entrances I feel to be in clear places. Now we have in the new-campus if you see... A1 you entered it from far hidden entrance. You have to turn around. You know the shape of each building is like square and the entrance is inside. Sometimes, when I go to other buildings, I turn around the whole building to look for the entrance.”* | Floor layout-FY |
| *“I feel modern can suits everyone. The modern style; something simple and nice”* | Style **EXT-1** |
| *“I feel it is a tall building and wide.”*  *“From outside, for example, you use geometrical shapes and play with the facades, and it is not like a square or rectangle or L letter or U letter.”*  *“I feel the look of nc hostel is nice. It is straight. I like these shapes squares and rectangles.”*  *“I feel it should not be too much big as number of floors. Three to five is reasonable. Not more.”* | Geometry **EXT-2** |
| *“You can play a little with the exterior design. Make it colorful for example.”*  *“Also the colors, it shows that it is something not formal; it is a university hostel.”*  *“Special colors, decoration, wait... I do not know. It looks special not only a normal empty wall.”* | Colors **EXT-3** |
| *“From outside, I want the windows to be clear... each room with its own window that is suitable for it. Not small ones.”*  *“I feel like… what I imagine is the windows are many.”*  *“It had many windows. I like building with glass facades. It will look nice.”* | Windows **EXT-4** |
| *“Its shape from outside is not scary, no. if someone saw it from outside, he will notice that it is s university hostel”*  *“As a look, I feel same like nc hostel. It looks comfortable; it is showing that it is a hostel for university students. The logos of the buildings everywhere explains that it is a university hostel.”* | Impression **EXT-** |
